# Supplementary material
Source: PubMed Central journal article supplement (PMC2943517)
Supplement: sxd0003-0326-s01.pdf [file sxd0003-0326-s01.pdf]

## Supplementary Data

```

A141R      GATGCTGAGACAGTGTGAGCCAGACTGTGAGTCCCCCACTGTGACCTGAGCCCCCGAG 60
PM4808F    GATGCTGAGACAGTGTGAGCCAGACTGTGAGTCCCCCACTGTGACCTGAGCCCCCGAG 60
A141F      GATGCTGAGACAGTGTGAGCCAGACTGTGAGTCCCCCACTGTGACCTGAGCCCCCGAG 60
PM4913R    GATGCTGAGACAGTGTGAGCCAGACTGTGAGTCCCCCACTGTGACCTGAGCCCCCGAG 60
PM4913F    GATGCTGAGACAGTGTGAGCCAGACTGTGAGTCCCCCACTGTGACCTGAGCCCCCGAG 60
A291R      GATGCTGAGACAGTGTGAGCCAGACTGTGAGTCCCCCACTGTGACCTGAGCCCCCGAG 60
A291F      GATGCTGAGACAGTGTGAGCCAGACTGTGAGTCCCCCACTGTGACCTGAGCCCCCGAG 60
A66F       GATGCTGAGACAGTGTGAGCCAGACTGTGAGTCCCCCACTGTGACCTGAGCCCCCGAG 60
A1013F     GATGCTGAGACAGTGTGAGCCAGACTGTGAGTCCCCCACTGTGACCTGAGCCCCCGAG 60
A185R      GATGCTGAGACAGTGTGAGCCAGACTGTGAGTCCCCCACTGTGACCTGAGCCCCCGAG 60
A139R      GATGCTGAGACAGTGTGAGCCAGACTGTGAGTCCCCCACTGTGACCTGAGCCCCCGAG 60
A139F      GATGCTGAGACAGTGTGAGCCAGACTGTGAGTCCCCCACTGTGACCTGAGCCCCCGAG 60
          *****

A141R      CCCACCCAGCCCCGGGTCCACTCTCTTACCTGCTCCTGTGGCACTGACTTCTGCAATG 120
PM4808F    CCCACCCAGCCCCGGGTCCACTCTCTTACCTGCTCCTGTGGCACTGACTTCTGCAATG 120
A141F      CCCACCCAGCCCCGGGTCCACTCTCTTACCTGCTCCTGTGGCACTGACTTCTGCAATG 120
PM4913R    CCCACCCAGCCCCGGGTCCACTCTCTTACCTGCTCCTGTGGCACTGACTTCTGCAATG 120
PM4913F    CCCACCCAGCCCCGGGTCCACTCTCTTACCTGCTCCTGTGGCACTGACTTCTGCAATG 120
A291R      CCCACCCAGCCCCGGGTCCACTCTCTTACCTGCTCCTGTGGCACTGACTTCTGCAATG 120
A291F      CCCACCCAGCCCCGGGTCCACTCTCTTACCTGCTCCTGTGGCACTGACTTCTGCAATG 120
A66F       CCCACCCAGCCCCGGGTCCACTCTCTTACCTGCTCCTGTGGCACTGACTTCTGCAATG 120
A1013F     CCCACCCAGCCCCGGGTCCACTCTCTTACCTGCTCCTGTGGCACTGACTTCTGCAATG 120
A185R      CCCACCCAGCCCCGGGTCCACTCTCTTACCTGCTCCTGTGGCACTGACTTCTGCAATG 120
A139R      CCCACCCAGCCCCGGGTCCACTCTCTTACCTGCTCCTGTGGCACTGACTTCTGCAATG 120
A139F      CCCACCCAGCCCCGGGTCCACTCTCTTACCTGCTCCTGTGGCACTGACTTCTGCAATG 120
          *****

A141R      CCAATTACAGCCATCTGCCTCCTCCAGGGAACCCTGGGACCCTGGCTCCCAGGGTCCCC 180
PM4808F    CCAATTACAGCCATCTGCCTCCTCCAGGGAACCCTGGGACCCTGGCTCCCAGGGTCCCC 180
A141F      CCAATTACAGCCATCTGCCTCCTCCAGGGAACCCTGGGACCCTGGCTCCCAGGGTCCCC 180
PM4913R    CCAATTACAGCCATCTGCCTCCTCCAGGGAACCCTGGGACCCTGGCTCCCAGGGTCCCC 180
PM4913F    CCAATTACAGCCATCTGCCTCCTCCAGGGAACCCTGGGACCCTGGCTCCCAGGGTCCCC 180
A291R      CCAATTACAGCCATCTGCCTCCTCCAGGGAACCCTGGGACCCTGGCTCCCAGGGTCCCC 180
A291F      CCAATTACAGCCATCTGCCTCCTCCAGGGAACCCTGGGACCCTGGCTCCCAGGGTCCCC 180
A66F       CCAATTACAGCCATCTGCCTCCTCCAGGGAACCCTGGGACCCTGGCTCCCAGGGTCCCC 180
A1013F     CCAATTACAGCCATCTGCCTCCTCCAGGGAACCCTGGGACCCTGGCTCCCAGGGTCCCC 180
A185R      CCAATTACAGCCATCTGCCTCCTCCAGGGAACCCTGGGACCCTGGCTCCCAGGGTCCCC 180
A139R      CCAATTACAGCCATCTGCCTCCTCCAGGGAACCCTGGGACCCTGGCTCCCAGGGTCCCC 180
A139F      CCAATTACAGCCATCTGCCTCCTCCAGGGAACCCTGGGACCCTGGCTCCCAGGGTCCCC 180
          *****

A141R      AAGCTATCCCAG 192
PM4808F    AAGCTATCCCAG 192
A141F      AAGCTATCCCAG 192
PM4913R    AAGCTATCCCAG 192
PM4913F    AAGCTATCCCAG 192
A291R      AAGCTATCCCAG 192
A291F      AAGCTATCCCAG 192
A66F       AAGCTATCCCAG 192
A1013F     AAGCTATCCCAG 192
A185R      AAGCTATCCCAG 192
A139R      AAGCTATCCCAG 192
A139F      AAGCTATCCCAG 192
          *****

```

**Figure1:** Multiple sequence alignment of *MISRII* exon3 of animals in Figure 2. The PMDS mutation is highlighted. N represents the CT heterozygous condition. F and R represent forward and reverse reads respectively.
